# Supplementary material for: The bacterial cytochrome P450 (CYP) CYP125 enzymes can competitively oxidise sitosterol in the presence of cholesterol
Source: Royal Society of Chemistry journal article supplement (doi:10.1039/d3cc02312e), 2023-01-01
Supplement: d3cc02312e1.pdf [file d3cc02312e1.pdf]

## Supplementary Information:

### The bacterial cytochrome P450 (CYP) CYP125 enzymes can competitively oxidise sitosterol in the presence of cholesterol.

#### Experimental

##### General

Unless otherwise stated, chemicals were purchased from Sigma-Aldrich. Kanamycin, detergents, DTT, and IPTG were from Astral Scientific. NADPH was from Applichem, and glucose-6-phosphate and glucose-6-phosphate dehydrogenase from Roche. Steroid substrates were purchased from Carbosynth (UK). The media for cell growth and maintenance (LB, SOC, and trace elements) were prepared as reported previously<sup>1</sup>.

##### Recombinant protein expression and purification

MmarCYP125A6 and MtbCYP125A1 were cloned into the pET26 vector, expressed in BL21(DE3) cells and purified as previously described<sup>1</sup>. The codon optimised MulcCYP125A7 gene, along with a C-terminal 6xHis-tag, two stop codons and a HindIII restriction site were cloned in a pET29 vector obtained from Twist Biosciences. The sequence of the amino acid sequence encoded by the gene is shown below.

```
MAPCPNLPPGFDFTDPDIYAERLPVEEFAELRSSEPIWWDEQFPGQGGGFHDGGFWAITKLKDVKEVSRSDVFSSYENG  
VIPRFKNDIAREDIDVQRFVMLNMDAPHHTRLRKKIISRGFTPRAIGRLHDELNDRAQNIAKAAAAAGSGDFVEQVSCLEPL  
QAIAGLLGIPQEDRGKLFDWSNEMTGTEDPEFAHIDAKASSVELIGYAMKMAEEKAKNPGDDIVTQLIQADIDGKLSDDDE  
FGFFVVMLAVAGNETTRNSITQGMMAFADNPEQWELYKRERPGTAADEIVRWATPVTSFQRTALEDYELSGVQIKKGQR  
VLMFYRSANFDEEVFEDPFSFNILRNPNPVHVGFGGTGAHYCIGANLARMNTINLIFNAVADHMPDLKPIAAPERLRSGWLN  
GIKHWQVDYTGKCPVSHHHHHHH
```

The codon optimised RglobCYP125-04087 gene was cloned into the pET28 vector, expressed in BL21(DE3) cells and purified as previously described<sup>1</sup>. The sequence of the amino acid sequence encoded by the gene is shown below.

```
MTISDTRTRPDLPAAGFDVTDPAILGERIPFEEFAELRRSAPVWWCEQPPTVGGFQDEGYWVSRHADVKEVSQRSDIFSS  
WENTAIARFADDMPREAVEMLRHLLLNKDAPEHTKLRKLKSLFTPRAINGMRDELDRRARSIVDTAVGEGPGDFVKQIAS  
ELPLQAIADLIGVPQDDRDKLFKWSNEMMGYDDPEYVGDPAVASTEVLGYAYQMADARRSCPADDIVTTLVQADIDGD  
ALSPEEFGFFVLILAVAGNETTRNAITHGMIAFLENPEQWELYKKERPKTTADEIVRWATPVTAFAQRTALEDELAVSIIKKG  
QRVVMYSSANFDEEDVFEDPMTFDITRNPVHVGFGGTGAHFCIGANLARMEIDLMEFALADNVPDITKIGDPRRLRSG  
WINGIKEFQVDYKSTGCPVAH
```

Chemically competent BL21(DE3) *E. coli* (C2527 strain from New England Biolabs) cells were then transformed with the MulcCYP125A7-pET29 complex. The transformed cells underwent selection by plating onto LB<sub>kan</sub>. Single colonies were used to inoculate 500 mL of LB media in 2L flasks (for a total growth volume of 3L). The cells were grown at 37°C and 110 rpm for approximately 8 hrs at which point they were cooled to 18 °C. Once cooled, chaperone proteins were induced by the addition of benzyl alcohol (2 mM) and ethanol (2% v/v). Trace elements (0.4% v/v) were also added at this time. After 30 min, MulcCYP125A7 protein production was induced by the addition of IPTG (50mM). The cultures were shaken for 48 hours at 18 °C and 90 rpm.

The cells were harvested by centrifugation (5000 rpm for 10 min at 4 °C). The cells were re-suspended in 200 mL of 50 mM Tris pH 7.4 and lysed by sonication (40 cycles of 10:50 s on/off, 70% amplitude, 19 mm probe, Sonics Vibra-Cell). Cell debris was removed by centrifugation (18,000 rpm for 20 min at 4 °C). The supernatant was pooled and loaded directly onto a Nickel affinity column (Protino Ni-NTA Agarose 5 mL,

Machery-Nagel) pre-equilibrated with binding buffer (0.5 M NaCl, 20 mM Phosphate Buffer, 20 mM Imidazole, pH 7.4) at 4 mL/min. After loading, impurities were removed by washing the column with 25 mL (5 column volumes) of binding buffer at 2 mL/min, followed by elution of the protein with elution buffer (0.5 M NaCl, 20 mM Phosphate Buffer, 200 mM Imidazole, pH 7.4). The protein was desalted by gel-filtration (Sephadex G-25 medium grain) and the relative purity was measured by the 412/280 nm peak absorbance ratio, which was 0.5 at this stage. The protein was then concentrated to approximately 10 mL (Vivacell 100 10kDa membrane, Sartorius), followed by further anion-exchange purification using a 5 mL Hi-Trap Q-HP anion exchange column (Cytiva) and AKTA protein purification system. The column was pre-equilibrated in 50 mM Tris (pH 7.4) and the protein was eluted in a continuous salt gradient from 0-400 mM KCl (in 50 mM Tris pH 7.4). Red coloured fractions (2mL) were collected and the purity of each was measured by the 412/280 nm peak ratio. Fractions with 412/280 nm > 0.8 were pooled and concentrated to approximately 10 mL. The concentrated protein was desalted by gel-filtration (Sephadex G-25 medium grain) and concentrated again to 5 mL. Finally, the protein was filtered, mixed with 80% glycerol (50% v/v) and stored at -20 °C.

### **Extinction coefficient determination**

Extinction coefficients for MulcCYP125A7 ( $97 \text{ mM}^{-1}\text{cm}^{-1}$ ) was determined by methods previously described<sup>2</sup>, using the known extinction coefficient for CO-bound P450 absorbance at 450 nm of  $91 \text{ mM}^{-1}\text{cm}^{-1}$ . Extinction coefficients were determined at 412 nm, the isosbestic point between the low-spin and high-spin P450 heme states.

### **Substrate binding analysis**

Initial screening of substrate binding for all enzymes was undertaken by measuring the UV-Vis absorbance spectrum, where addition of substrate shifts the absorption maximum from the low-spin  $\sim 418 \text{ nm}$ , 6-coordinate heme to the  $\sim 390 \text{ nm}$  high-spin 5-coordinate heme, was measured<sup>3</sup>. Stored enzyme was eluted through a PD-10 size exclusion column (GE Healthcare) to remove glycerol and diluted to approx. 2-3  $\mu\text{M}$ . Substrate stocks were made up in 40% hydroxypropyl- $\beta$ -cyclodextrin in 50 mM Tris (pH 7.4) to 5 mM and 10 mM for sitosterol and cholesterol respectively. A Cary 60 UV-Vis Spectrophotometer (Agilent) was used to measure, after subtracting the baseline spectrum of 50 mM Tris (pH 7.4), the substrate-free P450 (600  $\mu\text{L}$ ) UV-Vis spectrum from 250-700 nm using a quartz cuvette. Substrate was then titrated, 1  $\mu\text{L}$  at a time into the P450 solution (substrate was not added to more than 5% v/v to avoid unwanted solvent effects), each time measuring the UV-Vis spectrum of the enzyme-substrate mixture until no further changes in the 418/390 nm peak ratio were observed.

### **GC-MS activity assay**

*In vitro* enzymatic oxidation reactions using a reconstituted NADPH/spinach ferredoxin/ferredoxin reductase redox system were conducted on a 600  $\mu\text{L}$  scale in duplicate. P450 (2  $\mu\text{M}$ ) was incubated with either cholesterol or sitosterol (100  $\mu\text{M}$ ) or a mixture of cholesterol/sitosterol (75  $\mu\text{M}$  of each) and oxygen saturated Tris buffer for 2 min at room temperature. Spinach ferredoxin (4  $\mu\text{M}$ ), spinach ferredoxin reductase (0.2 units/mL), glucose 6-phosphate (5 mM), glucose 6-phosphate dehydrogenase (0.7 units/mL) and catalase (0.2 mg/mL) were then added. The reaction was initiated by the addition of NADPH (1 mM). The reaction was allowed to continue in the dark for 24 hrs. Octanoic acid (100  $\mu\text{M}$ ) was added as an internal standard. The analytes were extracted three times with ethyl acetate and dried with  $\text{MgSO}_4$ . Ethyl acetate was evaporated over  $\text{N}_2$  after which the sample was dissolved in acetonitrile (150  $\mu\text{L}$ ). The sample was then derivatised for GC-MS analysis with BSFTA + TMCS (99:1, 15  $\mu\text{L}$ ) and heating at 37°C for 2 hrs. The derivatised samples were analysed by GC-MS using a Shimadzu GC-2010 equipped with a QP2010S GC-MS detector. The injection port temperature was 300 °C. The column (DB5 ms, 30 mm  $\times$  0.25 mm  $\times$  0.25  $\mu\text{m}$ ) was held at 70

°C for 1 min. The temperature was then increased to 280 °C at a rate of 15 °C min<sup>-1</sup> and held at 280 °C for 1 min. Finally, the temperature was increased to 300 °C at a rate of 15 °C min<sup>-1</sup> and held for 10 min.

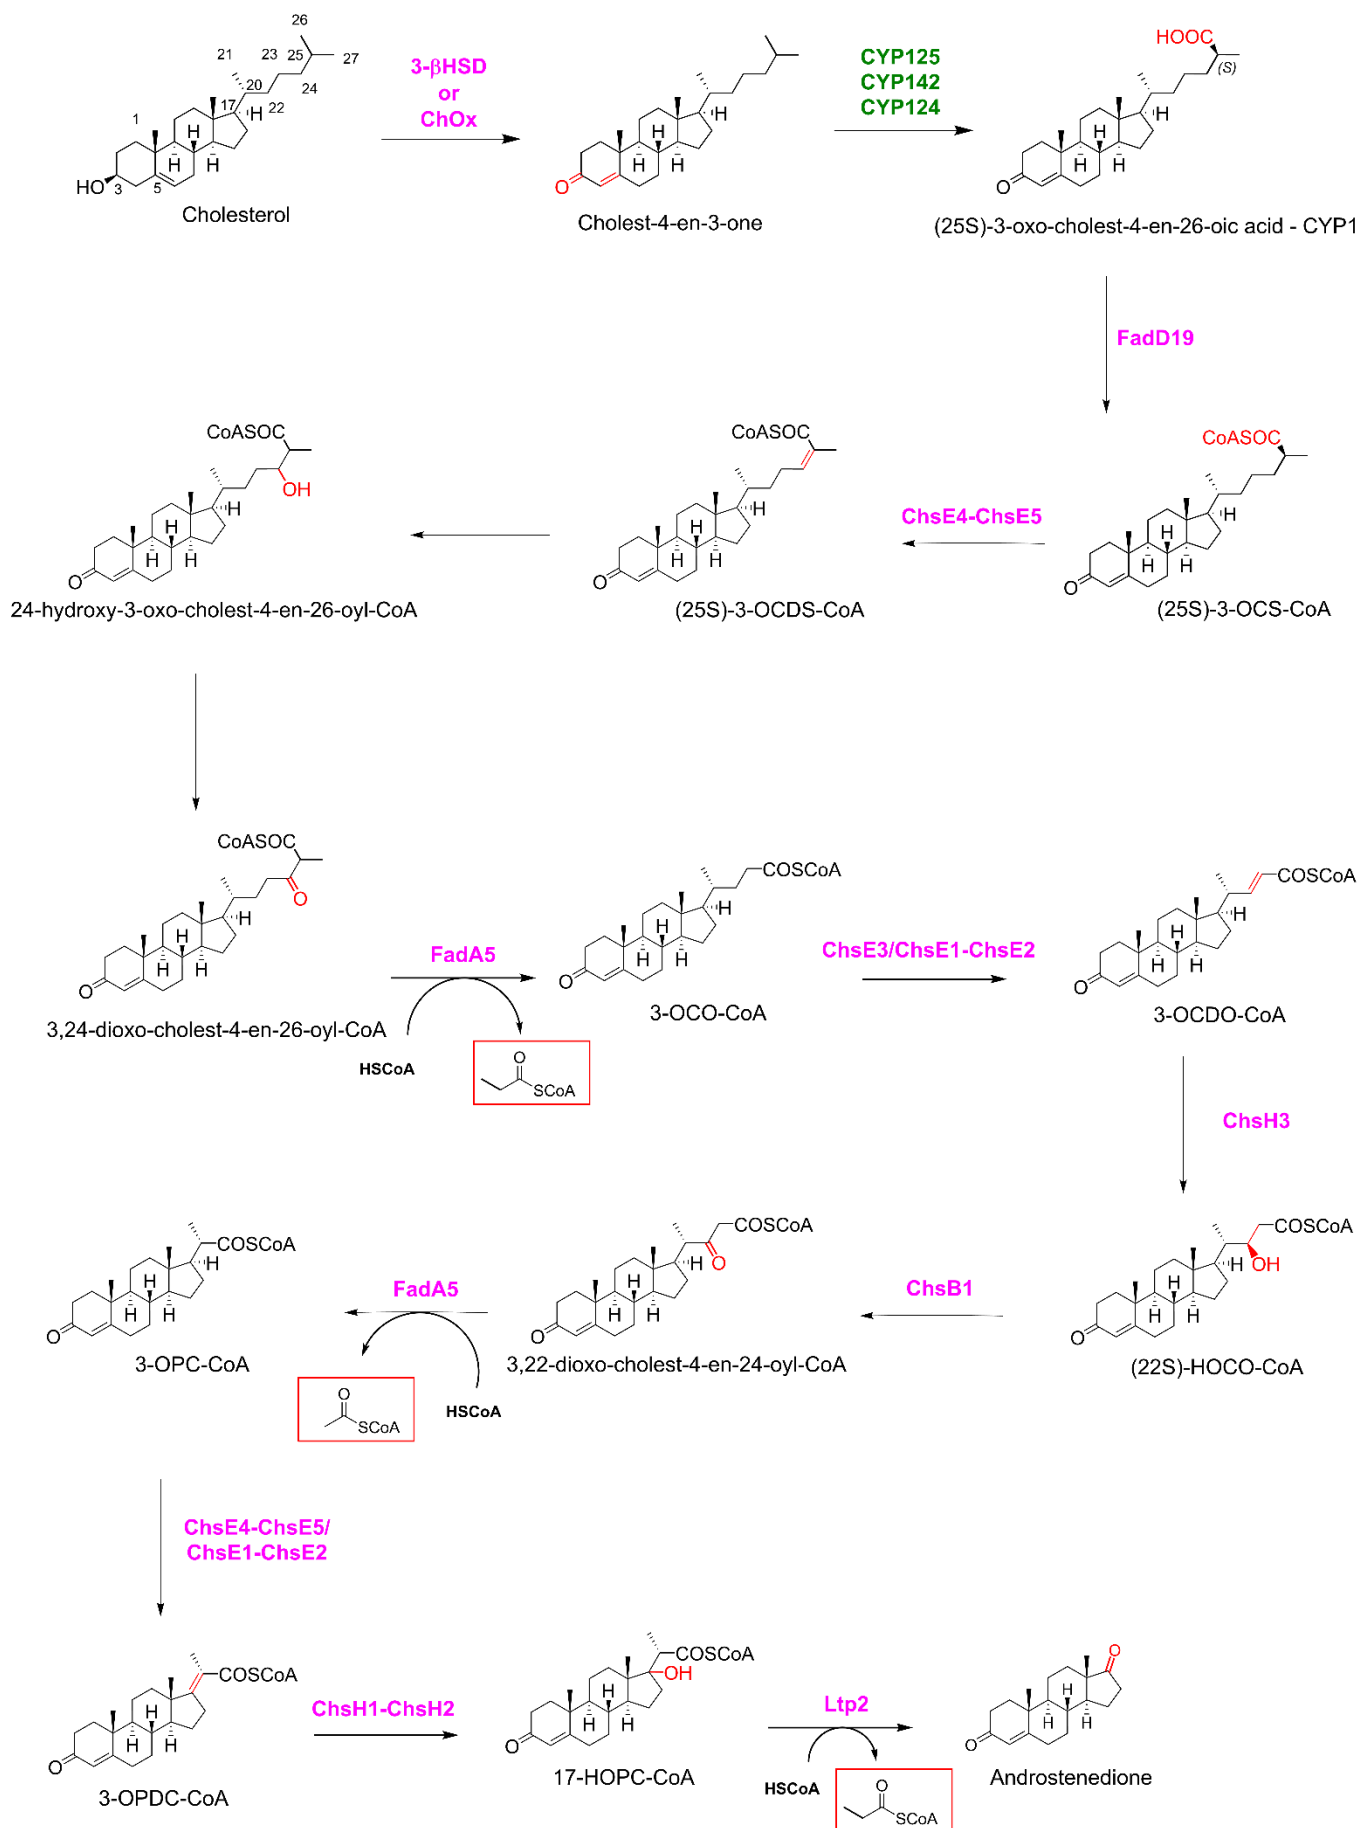

**Figure S1:** Proposed cholesterol oxidation pathway in mycobacteria. Characterised enzymes are shown in pink. P450 enzymes mentioned in this study are shown in green. Functional changes at each stage are

highlighted in **red**. This mechanism is based off of the initial findings of Sih *et. al*<sup>4</sup>. See main text references for individual enzyme characterizations.

**A**

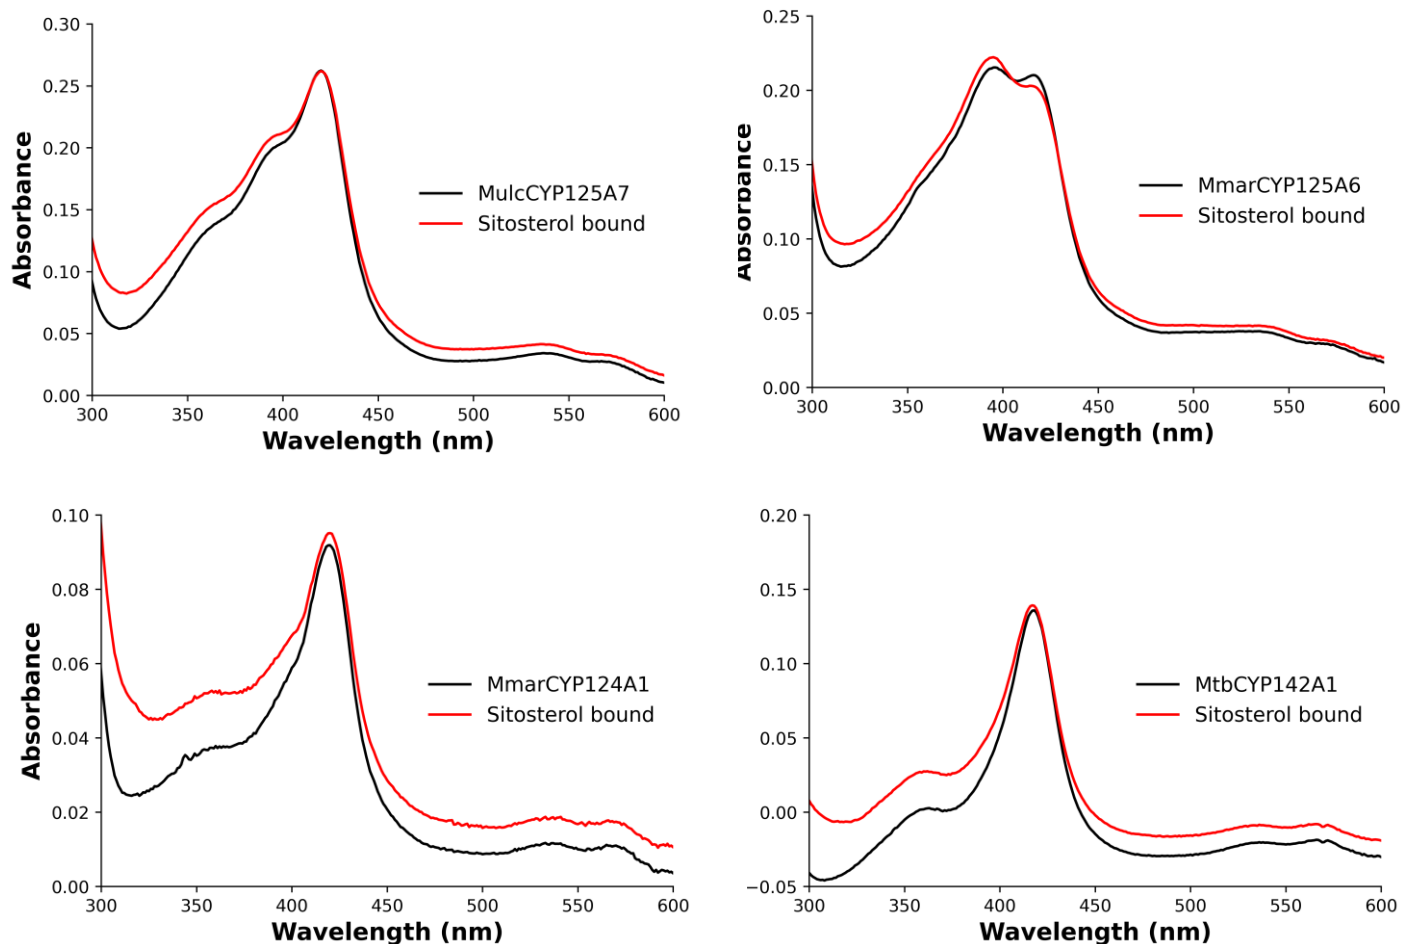

**B**

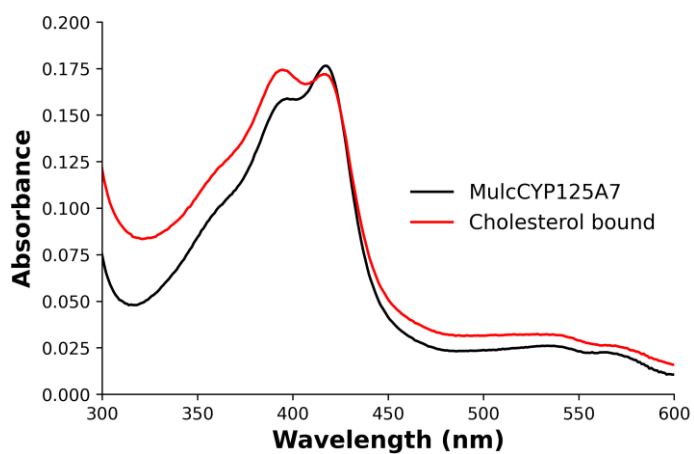

**Figure S2. A:** Spin state shift induced by the addition of sitosterol to MulcCYP125A7 (top left), MmarCYP125A6 (top right), MmarCYP124A1 (bottom left) and MtbCYP142A1 (bottom right). **B:** Spin state shift induced by the addition of cholesterol to MulcCYP125A7.

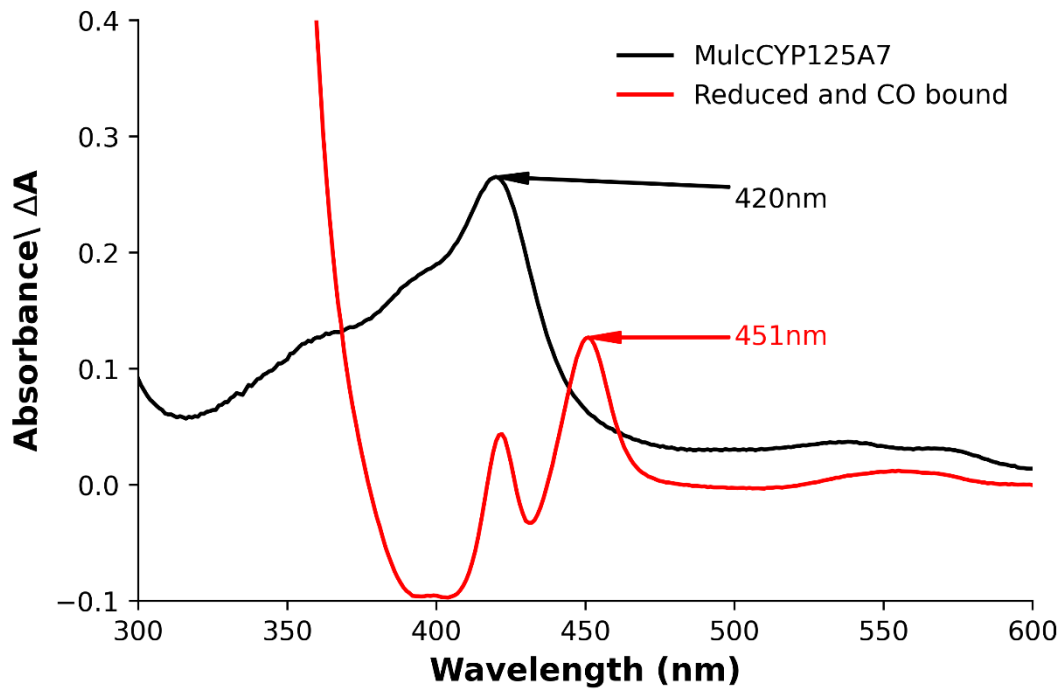

**Figure S3:** **Black:** Absolute UV-Vis absorbance spectrum of MulcCYP125A7. **Red:** Difference spectrum (with absolute protein spectrum as the baseline) after reduction with dithionite and addition of carbon monoxide, forming the characteristic 450 nm peak indicating functional enzyme.

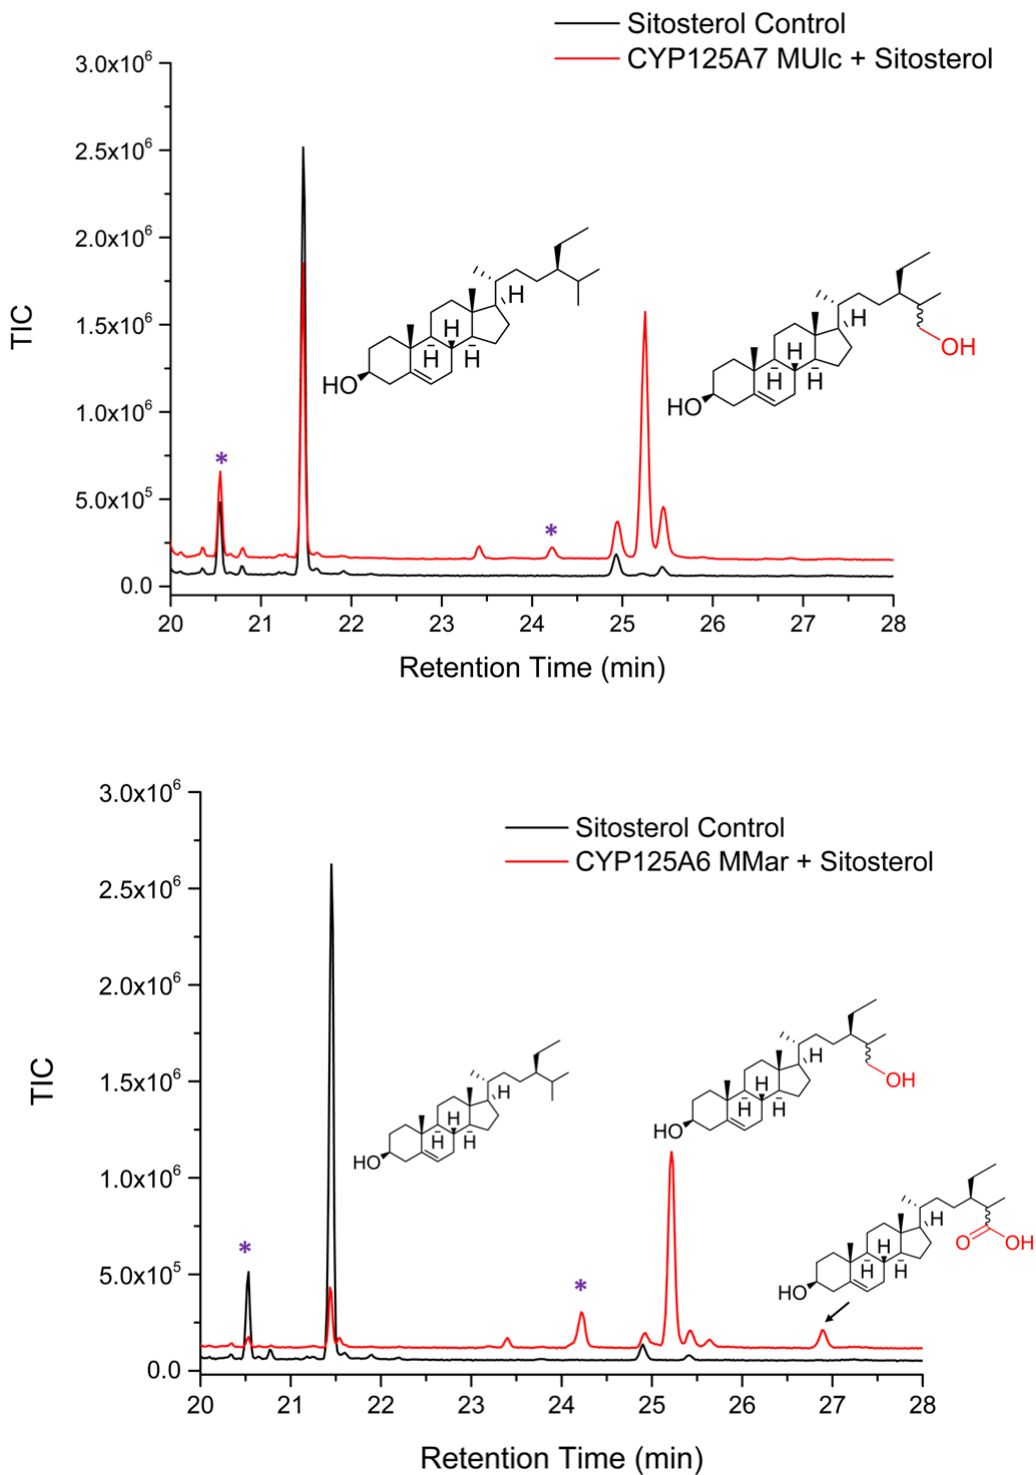

**Figure S4:** GC chromatograms of MulcCYP125A7 (left) and MmarCYP125A6 (right) *in vitro* oxidation of sitosterol using a reconstituted NADPH/Spinach Ferredoxin/Spinach Ferredoxin Reductase electron transfer system. Sitosterol control GC traces are shown in **black** and *in vitro* enzyme driven oxidation traces in **red**. A \* indicates peaks arising from campesterol impurity in the sitosterol stocks. Product peaks were identified by MS.

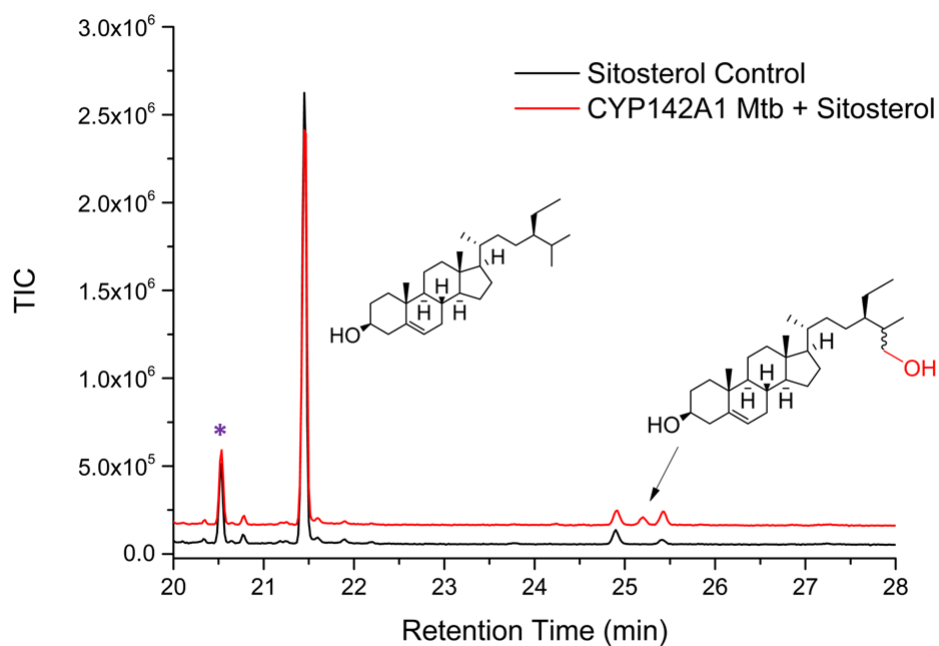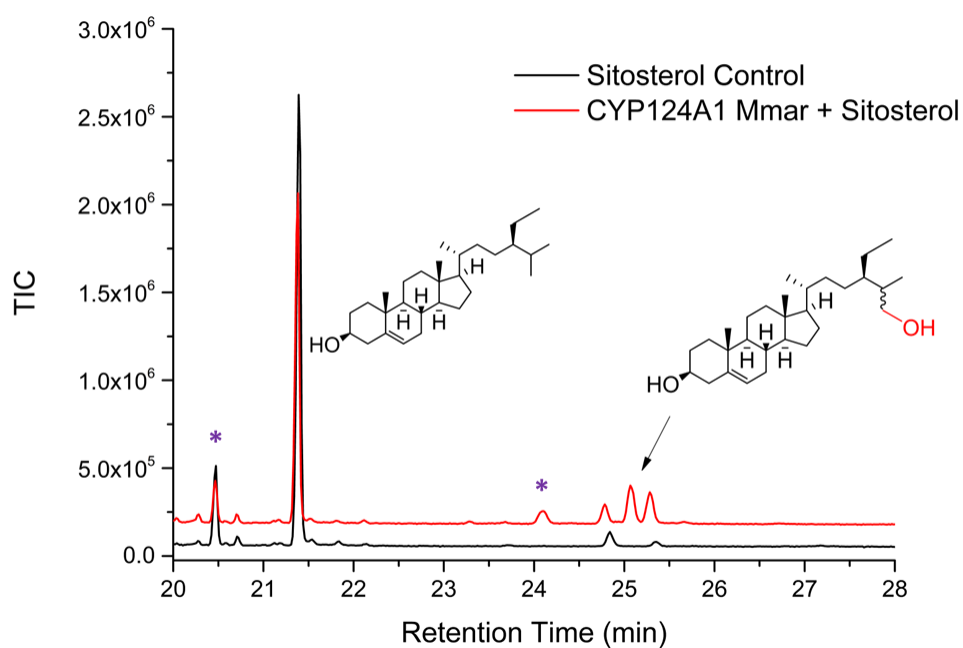

**Figure S5:** GC chromatograms of MtbCYP142A1 (top) and MmarCYP142A1 (bottom) *in vitro* oxidation of sitosterol using a reconstituted NADPH/Spinach Ferredoxin/Spinach Ferredoxin Reductase electron transfer system.

**Cholesterol control (RT: 19.5 – 19.6 min, Parent ion mass: 458)**

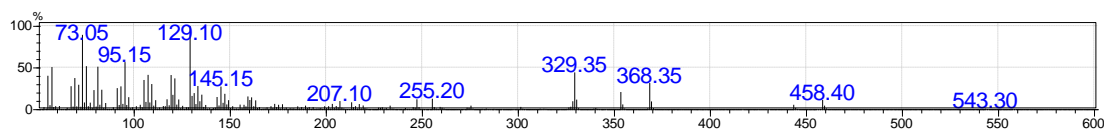

**Sitosterol control (RT: 21.3 – 21.5 min, Parent ion mass: 486)**

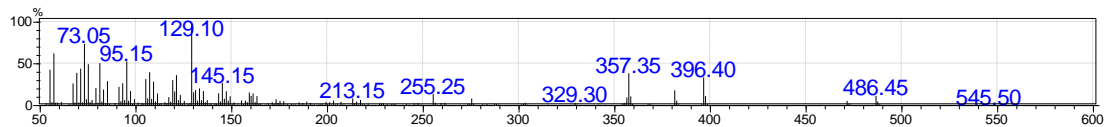

**26-hydroxycholesterol control (RT: 23.1 – 23.2 min, Parent ion mass: 546)**

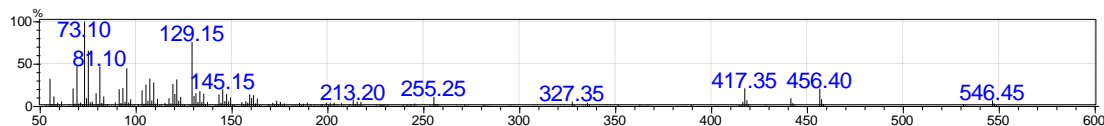

**26-hydroxysitosterol (RT: 25.1 – 25.2 min, Parent ion mass: 574)**

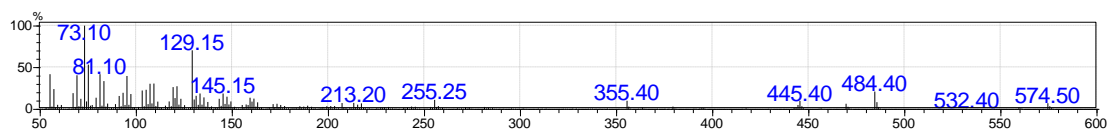

**Campesterol (RT: 20.4 – 20.5 min, Parent ion mass: 472)**

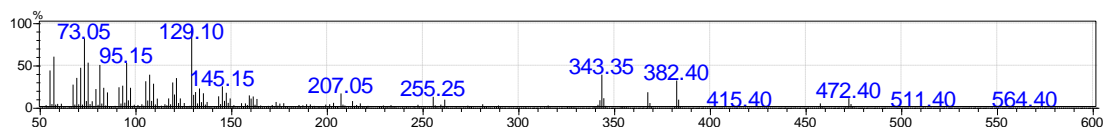

**26-hydroxycampesterol (RT: 24.1 min – 24.2 min, present in all turnovers, Parent ion mass: 560)**

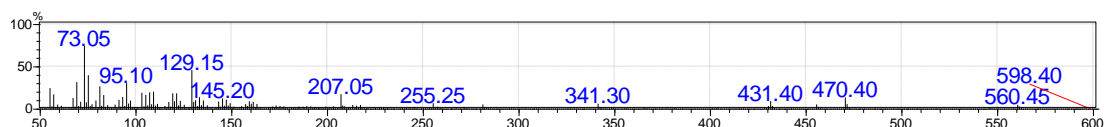

**26-sitostenic acid (RT: 26.8 – 27.0 min, Parent ion mass: 588)**

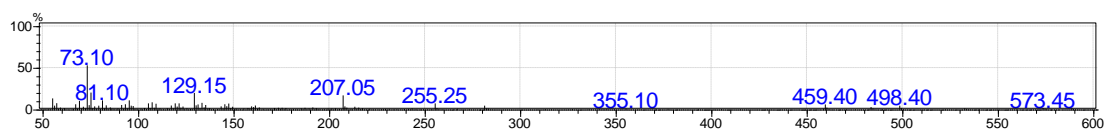

**Figure S6:** Mass spectra of major product peaks in the GC chromatograms for MtbCYP125A1 cholesterol/sitosterol oxidation reactions. These mass peak fragmentation patterns are representative of all hydroxylated and substrate peaks for CYP125 mediated TMS derivatised cholesterol and/or sitosterol turnovers.



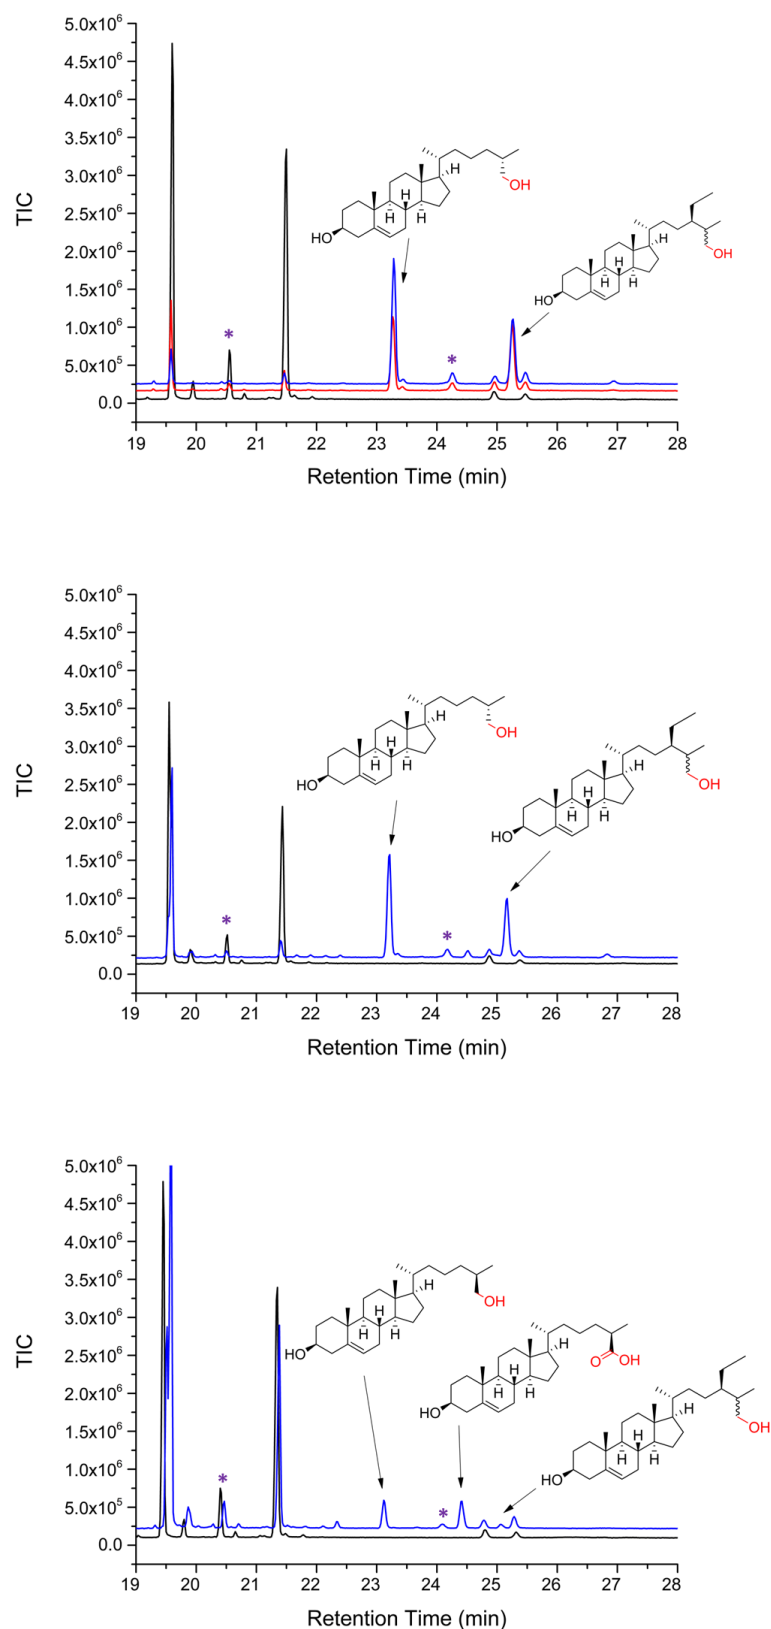

**Figure S7A:** GC chromatograms of MmarCYP125A6 (top) and MtbCYP125A1 (middle) and MmarCYP124A1 (bottom) *in vitro* competitive oxidation of sitosterol vs cholesterol using a reconstituted NADPH/Spinach Ferredoxin/Spinach Ferredoxin Reductase electron transfer system. 1:1 cholesterol/sitosterol control GC traces are shown in **black** and *in vitro* enzyme driven oxidation traces in **red** (6 hrs) and **blue** (24 hrs). A \* indicates peaks arising from campesterol impurity in the sitosterol stocks. Product peaks were identified by MS.

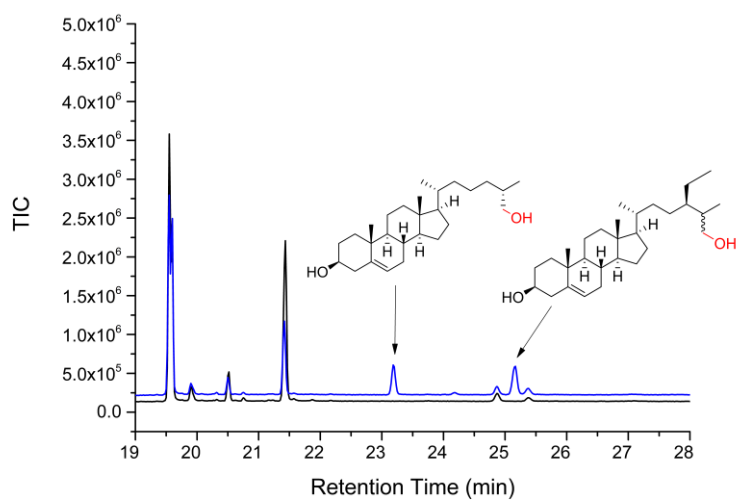

**Figure S7B:** GC chromatogram of RglobCYP125-04087 *in vitro* competitive oxidation of sitosterol vs cholesterol using a reconstituted NADPH/Spinach Ferredoxin/Spinach Ferredoxin Reductase electron transfer system. The 1:1 cholesterol/sitosterol control GC trace is shown in **black** and the *in vitro* enzyme driven oxidation trace in **blue** (24 hrs). A \* indicates peaks arising from campesterol impurity in the sitosterol stocks. Product peaks were identified by MS.

## References

1. Child, S. A.; Ghith, A.; Bruning, J. B.; Bell, S. G., A comparison of steroid and lipid binding cytochrome P450s from *Mycobacterium marinum* and *Mycobacterium tuberculosis*. *J Inorg Biochem* **2020**, *209*, 111116.
2. Omura, T.; Sato, R., The Carbon Monoxide-Binding Pigment of Liver Microsomes. I. Evidence for Its Hemoprotein Nature. *J Biol Chem* **1964**, *239*, 2370-8.
3. Isin, E. M.; Guengerich, F. P., Substrate binding to cytochromes P450. *Anal Bioanal Chem* **2008**, *392* (6), 1019-1030.
4. Sih, C. J.; Tai, H. H.; Tsong, Y. Y.; Lee, S. S.; Coombe, R. G., Mechanisms of steroid oxidation by microorganisms. XIV. Pathway of cholesterol side-chain degradation. *Biochemistry* **1968**, *7* (2), 808-18.
